# Supplementary material for: GIS-AHP Approach in Forest Logging Planning to Apply Sustainable Forest Operations
Source: MDPI journal article supplement (doi:10.3390/f13030484), 2022-03-21
Supplement: s1 [file s1]

Archive with 1 entries (1 files):
- forests-1631604_supplementary.pdf
