# Supplementary material for: GIS-AHP Approach in Forest Logging Planning to Apply Sustainable Forest Operations
Source: MDPI journal article supplement (doi:10.3390/f13030484), 2022-03-21
Supplement: s1 [file s1 › forests-1631604_supplementary.pdf]

### Legend

Macchia Faggeta Society Boundaries

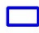

Extraction distance (m)

50

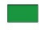

150

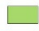

300

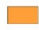

450

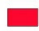

600

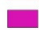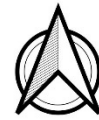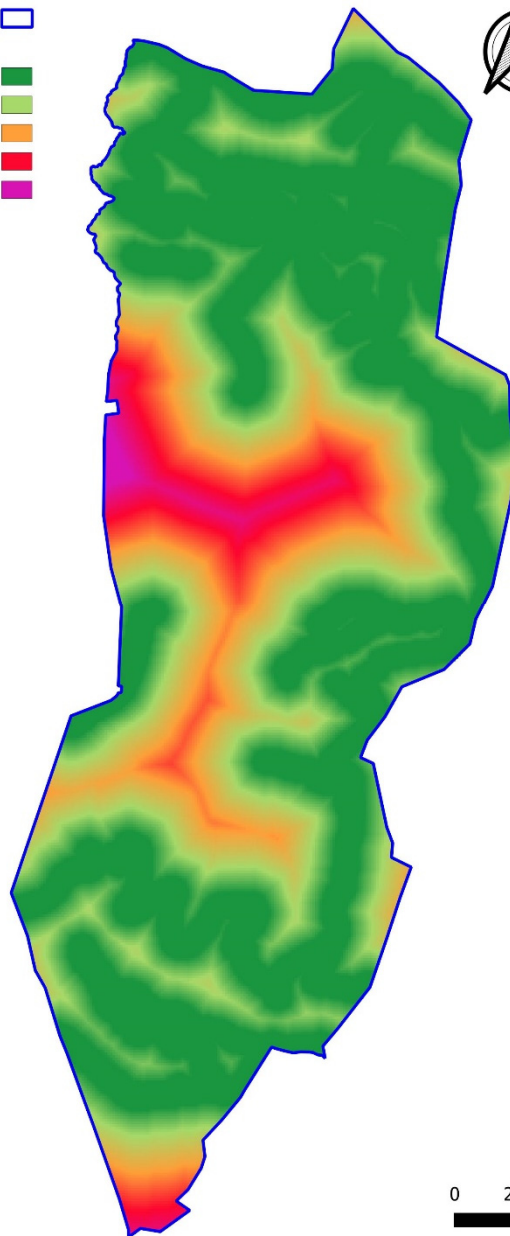

0 250 500 m

**Figure S1.** Map for the criterion extraction distance, measure unit is m.

### Legend

Macchia Faggeta Society Boundaries

Slope (%)

0-20%

20-40%

40-60%

60-80%

>80%

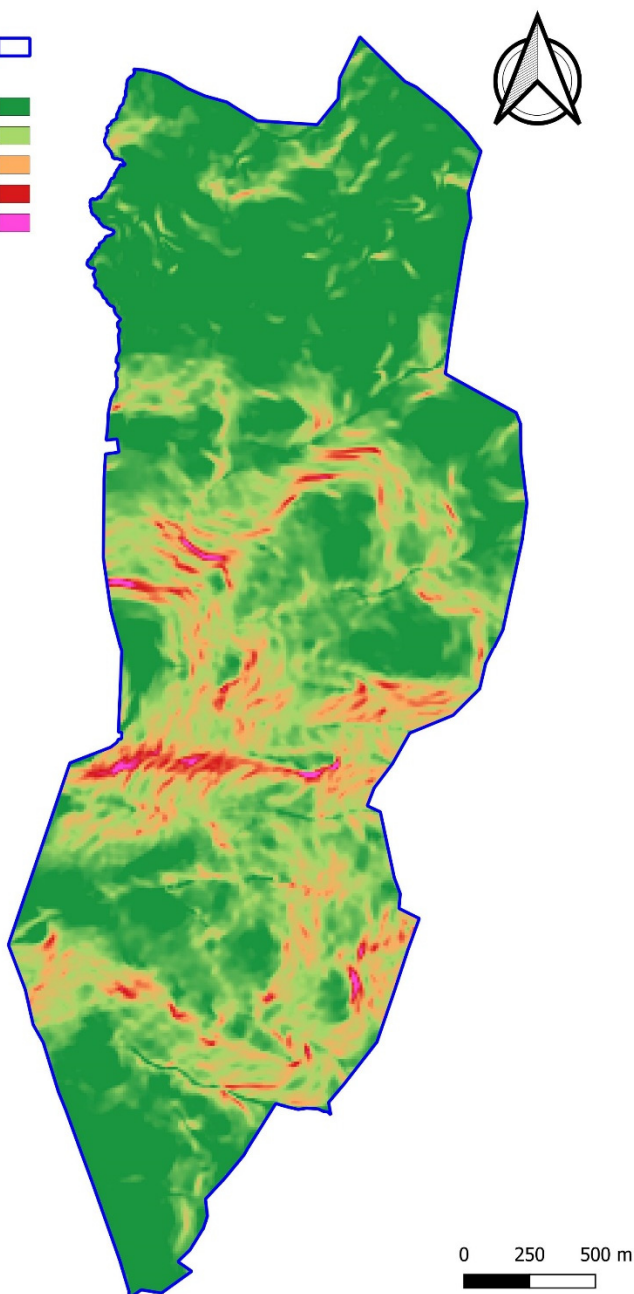

**Figure S2.** Map for the criterion slope, measure unit is %.

### Legend

- Macchia Faggeta Society Boundaries 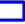
- No intervention areas 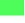
- Extracted timber amount
  - <80 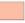
  - 80-200 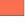
  - >200 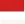

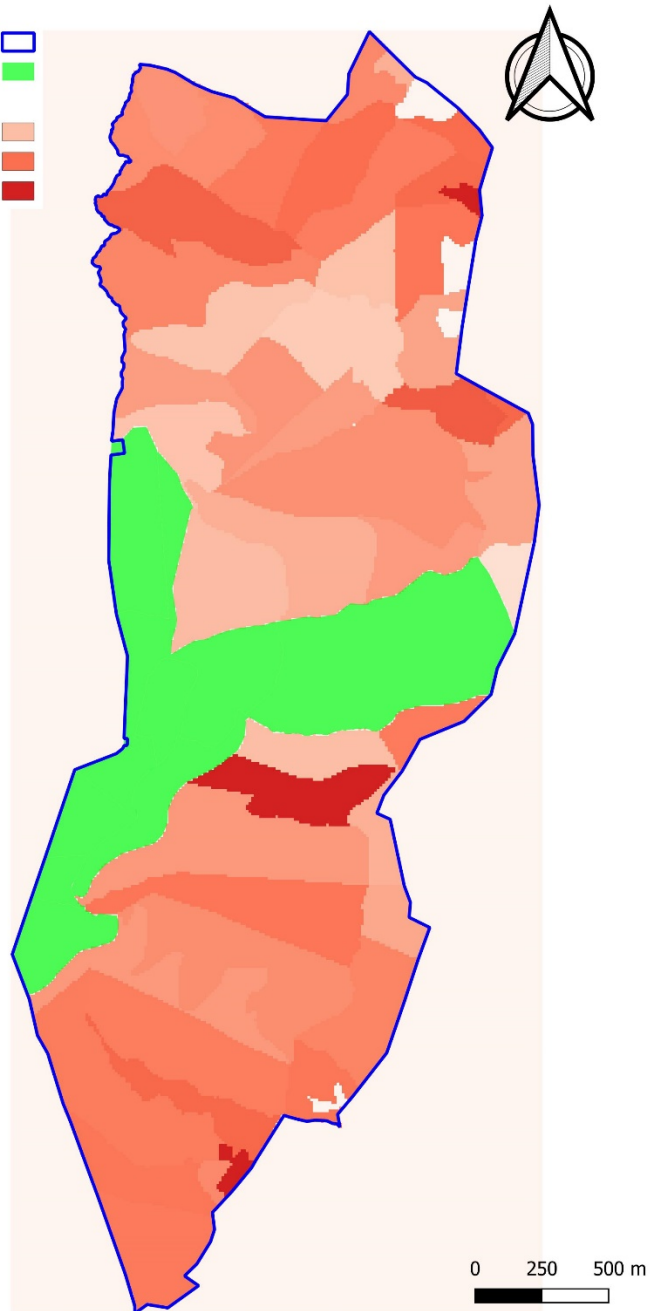

**Figure S3.** Map for the criterion extracted timber amount, measure unit is  $\text{m}^3 \text{ha}^{-1}$ .

## Legend

Macchia Faggeta Society Boundaries 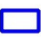

Road density

<37

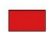

37-75

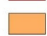

75-112

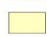

112-150

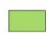

>150

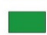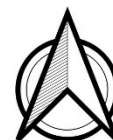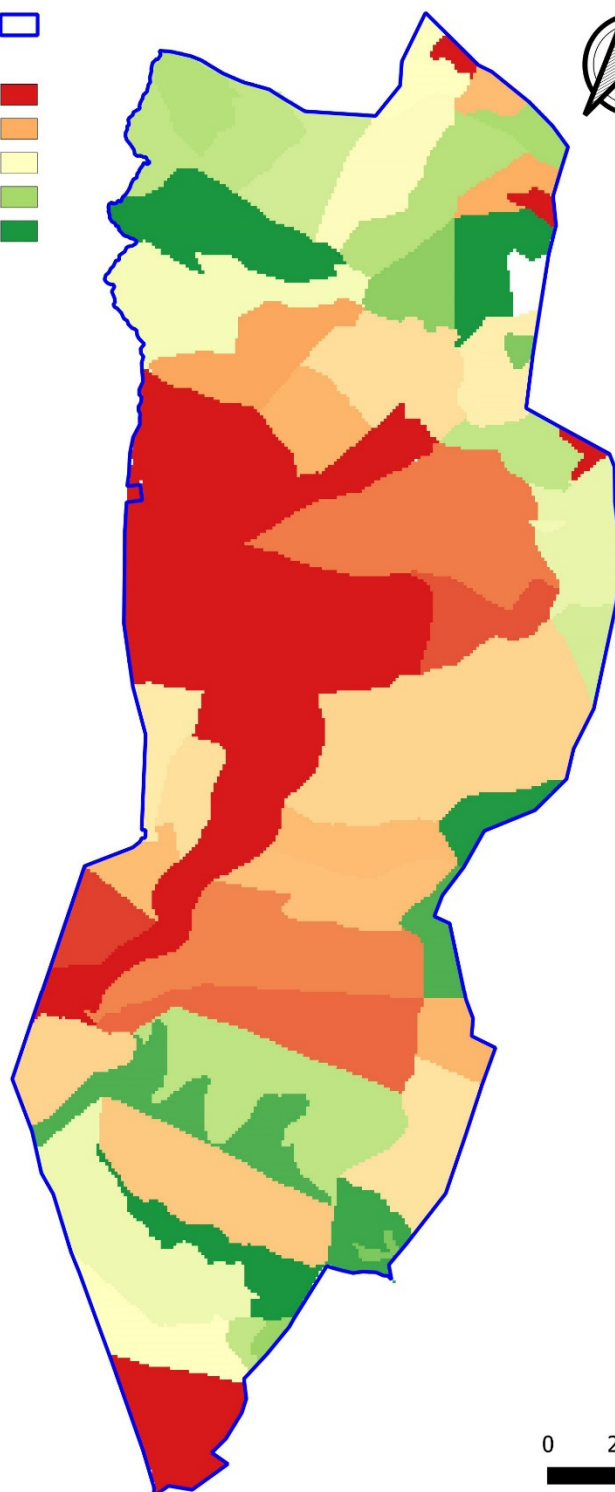

0 250 500 m

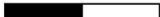

**Figure S4.** Map for the criterion road density, measure unit is  $\text{m ha}^{-1}$ .

## Legend

Macchia Faggeta Society Boundaries

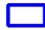

No intervention areas

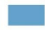

Roughness

$\leq 20$

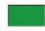

20 - 40

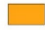

$> 40$

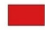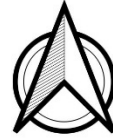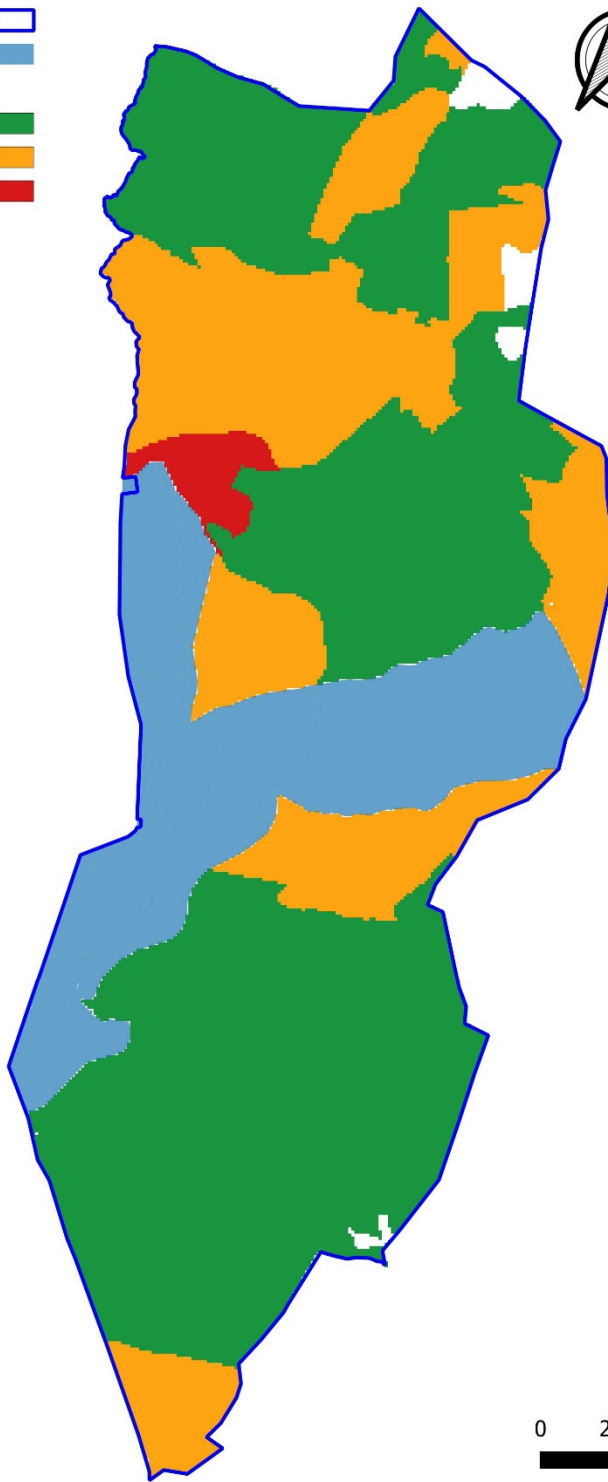

0 250 500 m

**Figure S5.** Map for the criterion roughness, measure unit is %.

### Legend

Macchia Faggeta Society Boundaries

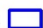

No intervention areas

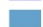

Sampling points

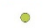

Soil bearing capacity

$\leq 34$

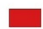

34 - 43

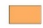

43 - 52

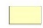

52 - 61

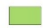

$> 61$

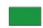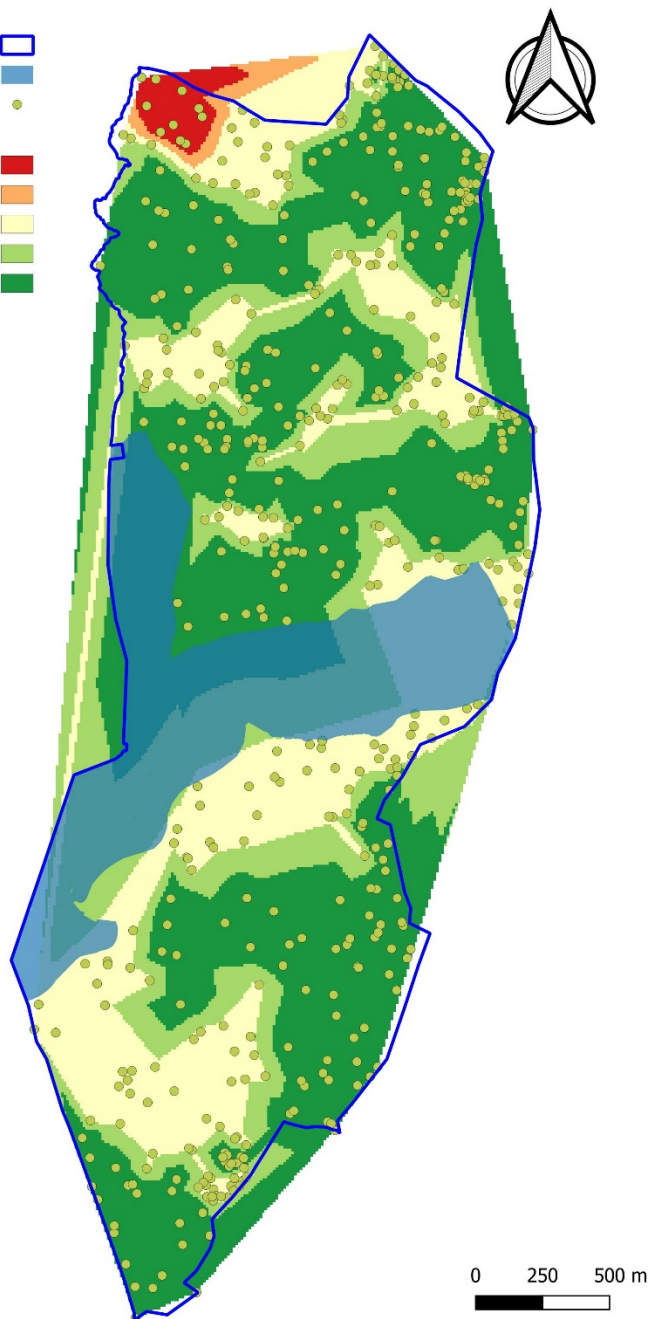

**Figure S6.** Map for the criterion soil bearing capacity, measure unit is kPa.
